# Supplementary material
Source: MDPI journal article supplement (https://www.mdpi.com/2071-1050/13/19/10793)
Supplement: s1 [file s1]

**HOUSEHOLD LEVEL**  
**HUMAN\_WILDLIFE INTERACTION SURVEY**

Enumerator name \_\_\_\_\_ Date \_\_\_\_\_  
 Respondent name \_\_\_\_\_ Village name \_\_\_\_\_  
 Education \_\_\_\_\_ Age \_\_\_\_\_  
 Ethnic background \_\_\_\_\_ Occupation \_\_\_\_\_  
 How many earning members are there in the household? \_\_\_\_\_  
 Home much agricultural land your family own? \_\_\_\_\_ Household size \_\_\_\_\_

**Livestock owned details:**

|         | Sheep | Goat | Cattle | Others |
|---------|-------|------|--------|--------|
| Numbers |       |      |        |        |

**Predator Status:**

**Did you sight any of the following specie in the past two years (2019-2020)?**

|                                    | Common Leopard | Grey wolf | Golden jackal | Red fox | Indian porcupine | Wild boar | Others |
|------------------------------------|----------------|-----------|---------------|---------|------------------|-----------|--------|
| Numbers                            |                |           |               |         |                  |           |        |
| Status<br>(Common/Rare/<br>Absent) |                |           |               |         |                  |           |        |

**Population of which specie you wish to increase (I), maintain (M), reduce (R), eliminate (E),  
from your area?**

| Common Leopard | Grey wolf | Golden jackal | Red fox | Indian porcupine | Wild boar | Others |
|----------------|-----------|---------------|---------|------------------|-----------|--------|
|                |           |               |         |                  |           |        |

**Which one is the most dangerous for livestock, rate 1-5 (from low to high):**

| Common Leopard | Grey wolf | Golden jackal | Red fox | Indian porcupine | Wild boar | Others |
|----------------|-----------|---------------|---------|------------------|-----------|--------|
|                |           |               |         |                  |           |        |

Questionnaire No. \_\_\_\_\_

**How many each of them is present in your area?**

| Common Leopard | Grey wolf | Indian jackal | Red fox | Indian porcupine | Wild boar | Others |
|----------------|-----------|---------------|---------|------------------|-----------|--------|
|                |           |               |         |                  |           |        |

**Predation Losses**  
**Predation in past 2 years:**

| Predator | Season/month | Location | Prey type | Prey sex | Prey age | Guarded (Y/N) | Circumstances |
|----------|--------------|----------|-----------|----------|----------|---------------|---------------|
|          |              |          |           |          |          |               |               |
|          |              |          |           |          |          |               |               |
|          |              |          |           |          |          |               |               |

Seasons: Winter (Dec-Feb), spring (Mar-May), summer (Jun-Aug), autumn (Sep-Nov)

**Crop damage by wildlife in past two years (estimated economic loss in PKR or US\$):**

| Species | Crop | Winter | Spring | Summer | Autumn |
|---------|------|--------|--------|--------|--------|
|         |      |        |        |        |        |
|         |      |        |        |        |        |
|         |      |        |        |        |        |
|         |      |        |        |        |        |

Seasons: Winter (Dec-Feb), spring (Mar-May), summer (Jun-Aug), autumn (Sep-Nov)

**Attacks of wild animals on humans in past two years?**

| Species | Victim sex | Victim age | Season | Habitat | Circumstances |
|---------|------------|------------|--------|---------|---------------|
|         |            |            |        |         |               |
|         |            |            |        |         |               |
|         |            |            |        |         |               |
|         |            |            |        |         |               |

**How many wild animals are killed in past two years in your area?**

| Common Leopard | Grey wolf | Indian jackal | Red fox | Indian porcupine | Wild boar | Others |
|----------------|-----------|---------------|---------|------------------|-----------|--------|
|                |           |               |         |                  |           |        |

**Any other additional details**

---
